# Supplementary material
Source: publisher site journal article supplement (https://www.dovepress.com/article/555071)
Supplement: Supplementary file 1 [file 555071%20Revised%20Supplementary%20Table%201.docx]

**Supplementary Table 1 List of Assays, Instruments, and Major Reagents**

| **Test** | **Method** | **Instrument** | **Reagent(s)** |
| --- | --- | --- | --- |
| 25 (OH) D | Chemiluminescence Immunoassay (CLIA) | LIAISON X (DiaSorin S.p.A., Saluggia, Italy) | Catalog No. 137483 |
| C3 | Immunoturbidimetry | Beckman Coulter Image 800 (Beckman Coulter, Brea, CA, USA) | Catalog No. M410493 |
| C4 | Immunoturbidimetry | Beckman Coulter Image 800 (Beckman Coulter, Brea, CA, USA) | Catalog No. M501519 |
| CD4+ | Flow Cytometric Intracellular Cytokine Staining | BD FACSLYRIC IM0143 (Franklin Lakes, NJ, USA) | Catalog No. 18646 |
| CD8+ | Flow Cytometric Intracellular Cytokine Staining | BD FACSLYRIC IM0143 (Franklin Lakes, NJ, USA) | Catalog No. 18646 |
| IL-6 | Electrochemiluminescence Immunoassay (ECLIA) | ROCHE COBAS E 602 (Roche Diagnostics, Indianapolis, IN, USA) | Catalog No. 79252600 |
| IL-8 | Chemiluminescence Immunoassay (CLIA) | SIEMENS IMMULITE 1000 (Siemens Healthineers, Germany) | Catalog No. 0291 |
| TNF-a | Chemiluminescence Immunoassay (CLIA) | SIEMENS IMMULITE 1000 (Siemens Healthineers, Germany) | Catalog No. 0433 |
| IL-10 | Chemiluminescence Immunoassay (CLIA) | SIEMENS IMMULITE 1000 (Siemens Healthineers, Germany) | Catalog No. 0442 |
| TG | Enzymatic Colorimetric Method | Roche Cobas C 701 (Roche Diagnostics , Indianapolis, IN, USA) | Catalog No. 861356 |
| UA | Uricase-PAP Method | Roche Cobas C 701 (Roche Diagnostics , Indianapolis, IN, USA) | Catalog No. 865052 |
| MCV | DC Detection Method | SYSMEX XN-9000 (Sysmex Corporation, Japan) | CELLPACK DCL (Catalog No. G4694)  SULFOLYSER (Catalog No. A5002) |
| Ca2+ | NM-BAPTA | Roche Cobas C 502 (Roche Diagnostics , Indianapolis, IN, USA) | Catalog No. 850567 |
| CRP | Latex Particle-Enhanced Immunoturbidimetry | Roche Cobas C 701 (Roche Diagnostics Corp, Indianapolis, IN, USA) | Catalog No. SKI001 |
| ESR | Westergren | VITAL DIAGNOSTICS Monitor-100 (VITAL DIAGNOSTICS, China) | NA |
